Urol Int, DOI: 10.1159/000548590  
Received: November 9, 2024  
Accepted: June 8, 2025  
Published online: February 12, 2026

## **Efficacy and Safety of Muscarinic Antagonists Combined with Adrenergic alpha-Antagonists in the Medical Expulsion Therapy for Distal Ureteral Stone: A Meta-Analysis**

Chen C, Mo C, Zhang S, Ning Z, Hou Z, Fan N, Ding H

ISSN: 0042-1138 (Print), eISSN: 1423-0399 (Online)  
<https://www.karger.com/UIN>  
Urologia Internationalis

### Disclaimer:

Accepted, unedited article not yet assigned to an issue. The statements, opinions and data contained in this publication are solely those of the individual authors and contributors and not of the publisher and the editor(s). The publisher and the editor(s) disclaim responsibility for any injury to persons or property resulting from any ideas, methods, instructions or products referred to the content.

### Copyright:

© 2026 S. Karger AG, Basel

## TITLE PAGE

### Efficacy and Safety of Muscarinic Antagonists Combined with Adrenergic alpha-Antagonists in the Medical Expulsion Therapy for Distal Ureteral Stone: A Meta-Analysis

Chuanjian Chen<sup>1,\*</sup>, Chunhao Mo<sup>1,\*</sup>, Shaolong Zhang<sup>1</sup>, Zhongyun Ning<sup>1</sup>, Zizhen Hou<sup>1,#</sup>, Ning Fan<sup>1,#</sup>, Hui Ding<sup>1,#</sup>

1 Department of Urology, Gansu Province Clinical Research Center for urinary system disease, Lanzhou University Second Hospital, Lanzhou, China.

\* These authors contributed equally to this work.

Running head: Muscarinic Antagonists Combined with Adrenergic alpha-Antagonists for Distal Ureteral Stone

#Corresponding Author: Hui Ding, Ning Fan, Zizhen Hou, Cuiying Men 80, Chengguan District, Lanzhou, Gansu, China. Postal address: 730030. email: [dingh08@126.com](mailto:dingh08@126.com), [fgcfn@163.com](mailto:fgcfn@163.com), [houzizhen@126.com](mailto:houzizhen@126.com)

Keywords: Meta-Analysis, Ureteral calculus, Urolithiasis

## Abstract

**Introduction:** Lower ureteral stones, due to their proximity to the bladder, frequently cause irritation symptoms and voiding disturbances. The efficacy of combining adrenergic alpha-antagonists with muscarinic antagonists in improving stone expulsion and alleviating lower urinary tract symptoms (LUTS) remains uncertain. This meta-analysis aims to evaluate the clinical benefit of such combination therapy for distal ureteral calculi.

**Methods:** A comprehensive literature search was conducted across PubMed, Embase, Cochrane Library, Web of Science, and major Chinese databases through October 2024. Only randomized controlled trials comparing combination therapy with monotherapy were included. The quality of evidence was assessed using the GRADE framework, and meta-analyses were performed using RevMan 5.3 software.

**Results:** Eight RCTs comprising 800 patients were included. Combination therapy significantly improved stone expulsion rates compared to either alpha-blockers alone (RR = 1.13;  $p = 0.04$ ) or muscarinic antagonists alone (RR = 1.53;  $p < 0.00001$ ). It also reduced pain episodes (MD = -0.75;  $p < 0.0001$ ) and severity (VAS), and improved urgency symptoms (USS) at 3 and 7 days. No significant difference in stone expulsion time was observed. Constipation and dry mouth were more common in the combination group.

**Conclusion:** Combination therapy with alpha-blockers and muscarinic antagonists improves stone expulsion and symptomatic relief in patients with lower ureteral stones  $< 10$  mm, without significantly affecting stone passage time, but at the cost of more anticholinergic side effects.

Word count : 3608

## Introduction

Urinary calculi is one of the most common diseases of the urinary system and is more common in men than in women. It has an estimated total prevalence rate as high as 15%[1, 2] and a recurrence rate of 50% within 5 years after initial onset[3]. The high incidence rate of urinary calculi increases the medical burden annually. In fact, expenditure in the United States is estimated to exceed USD 4 billion by 2030[4–6]. Three treatments are commonly used for patients with stones  $< 10$  mm: shock wave lithotripsy, medical expulsive therapy (MET) and ureteroscopy. Spontaneous or medicated stone removal is generally recommended for patients without severe clinical symptoms or complete urinary tract obstruction[7]. However, the larger

stones make spontaneous passage more difficult and may even cause renal colic. Some studies have suggested that recurrent renal colic may be related to spontaneous stone expulsion[8]. Alpha 1A- and 1D-adrenergic receptors are mainly expressed in the smooth muscle cells of the ureter. Alpha-blockers can reduce urinary tract obstruction by relieving ureteral smooth muscle tension and spasm and are currently one of the standard drugs for the treatment of urinary calculi[9]. The intramural ureter is the narrowest part of the ureter, and the most important obstacle to stone expulsion is at the end of the ureter[10]. Therefore, nearly 70% of urinary tract stones are distal ureteral stones[11]. Due to their proximity to the bladder, lower urinary tract stones often cause bladder irritation and urinary stream interruption. Muscarinic antagonists selectively block M2 and M3 receptors at the level of bladder detrusor muscle cells and reduce bladder afferent nerve activity to reduce involuntary bladder contraction or change contraction threshold, thereby, increasing bladder capacity and improving urination urgency[12]. For the treatment of lower ureteral stones, does the combination of alpha-blocker and muscarinic antagonist alleviate lower urinary tract discomfort during stone expulsion? The objectives of this study were to compare the efficacy and safety of a combination of alpha-blocker and muscarinic antagonist with alpha-blocker alone for the removal of lower ureteral calculi and to investigate the capability of this combination in alleviating lower urinary tract symptoms (LUTS) based on existing clinical trials.

### **Materials and Methods**

This review followed the Preferred Reporting Items for Systematic Reviews and Meta-Analysis guidelines (suppl.material PRISMA Checklist) and was registered at PROSPERO (CRD42024598671).

#### **Search Strategy and Selection Criteria**

We performed a systematic search of the PubMed, Embase, Cochrane Library, Web of Science and Chinese databases to identify clinical studies on the use of alpha-blockers combined with muscarinic antagonists for the treatment of patients with lower ureteral stones published from database inception to October 2024. When multiple publications of the same study were found, the latest published data were used. The references included in the studies were manually reviewed. Only randomised controlled trials were included.

We defined study eligibility using the patient population, intervention, comparator, outcomes approach and study design criteria. Studies comparing the efficacy and safety between muscarinic antagonists combined with alpha-blockers and alpha-blockers or muscarinic antagonists alone in medical expulsion therapy for distal ureteral stones were included. The specific inclusion criteria were as follows: (1) studies on humans, (2) original research, (3) enrolled patients with distal ureteric stone measuring  $\leq 10$  mm in diameter and (4) use of alpha-blockers and/or muscarinic antagonists. The exclusion criteria were (1) age  $< 18$  years, (2) patients who were pregnant and lactating, (3) urinary tract infection, (4) renal colic more than 24 h, (5) renal insufficiency, (6) single kidney, (7) ureteral stricture, (8) ureteral tumour, (9) history of distal ureter surgery, (10) bilateral ureteral calculi, (11) concomitant upper urinary tract stones, (12) moderate or severe hydronephrosis and (13) allergic reaction to alpha-blockers and/or muscarinic antagonists.

#### **Data Extraction**

Data were independently extracted by two authors (CJ Chen and ZY Ning). Any disagreement between the two authors was resolved by a third author (H Ding). The following data were extracted from the included trials: first author, year of publication, intervention group, control group, total number of patients, enrolled patients, treatment duration and outcome data.

#### **Outcomes**

The outcome measures of the included studies were (1) stone excretion rate (SER), which was defined as the percentage of patients with stone excretion at the end of follow-up; (2) stone excretion time (SET), which was defined as the time when the patients self-reported stone expulsion and was accurately confirmed by imaging studies; (3) pain episodes (PE), which was defined as the frequency of pain attacks during stone removal; (4) Visual Analogue Scale (VAS), which recorded patients' subjective description of pain [13, 14] and (5) urine sensation scale (USS), which assessed the urgency of each urination.

#### **Assessment of Certainty of Evidence**

Two investigators independently assessed the quality level of the included studies using the Cochrane Collaboration tool[15]. Aspects, such as randomisation, allocation and blinding processes, outcome reporting and other types of bias were assessed and assigned a grade of low, high or uncertain risk based on quality evaluation. Any disagreement was resolved by discussion with a third reviewer until a consensus was

reached. Using the GRADE system, each unique pooled analysis was evaluated and categorised as high, moderate, low or very low quality of evidence[16].

### **Statistical Analysis**

All statistical analyses were conducted using the Cochrane Collaboration Review Manager software (RevMan 5.3). In the summary analysis, risk ratio (RR) was used to evaluate dichotomous data, such as SER and adverse effects, and weighted mean difference (MD) was used to evaluate continuous data, such as SET, PE, USS and VAS. We selected two-sided tests, and  $P < 0.05$  was considered to indicate statistical significance. Inconsistency was quantified using the  $I^2$  statistic. When  $I^2$  was  $>50\%$  or  $P$  was  $\leq 0.1$ , which suggested substantial heterogeneity, the random effects model (DerSimonian–Laird method)[17] was used; otherwise, the fixed effects model (Mantel–Haenszel method)[18] was applied. Sensitivity analyses were conducted by sequentially excluding each study to validate the reliability of the results and analyse heterogeneity. The presence of possible publication bias was investigated using a funnel plot; if possible, sub-analysis was performed to control this bias.

## **Results**

### **Study Selection and Characteristics**

The database search for Medical Subject Headings and free terms retrieved 42 articles. After removing duplicates, 36 studies were retained; another 12 were removed after reviewing titles and abstracts. Finally, after screening the full text of the remaining 24 articles, 8 clinical trials were included in the systematic review (Figure 1). Eight trials [13, 14, 19–24] involving 800 patients compared alpha-blockers in combination with muscarinic antagonists and alpha-blockers or muscarinic antagonists alone. The studies included in our meta-analysis are summarised in Table 1, and their efficacy results are summarised in Table 2.

### **Risk of Bias and GRADE Quality Assessment**

As shown in Figure 2, the study randomisation method[24] was in order of precedence rather than strict randomisation, and there was a risk of bias in sequence generation. One study[13] described the method for allocation concealment, but other studies did not. Four studies[13, 14, 19, 24] did not clearly explain whether participants were informed, and three studies[14, 19, 24] did not clearly explain whether subjects were informed, so there were unclear performance and detection biases. All studies reported loss to follow-up, withdrawal and all outcomes, thereby, avoiding attrition and reporting biases. All studies were adequately described to exclude other sources of bias. Based on the GRADE system, each unique pooled analysis was categorised as either low or very low quality evidence (Supplementary Table 1).

## **Meta-analysis**

### **Stone Expulsion Rate**

Pooled meta-analysis (Figure 3) showed a significant benefit in SER among patients treated with a combination of muscarinic antagonists and alpha-blockers than among those treated with alpha-blockers alone (RR = 1.13, 95% CI 1.00 to 1.27;  $P = 0.04$ ,  $I^2 = 51\%$ ).

Four studies compared SER between combination therapy and muscarinic antagonists. Pooled results showed significantly higher SER with combination therapy than with muscarinic antagonist alone (RR = 1.53, 95% CI 1.26 to 1.87;  $P < 0.0001$ ,  $I^2 = 0\%$ ). Four studies compared SER between alpha-blockers and muscarinic antagonists. Pooled results showed significantly higher SER with alpha-blockers alone than with muscarinic antagonist alone (RR = 1.55, 95% CI 1.27 to 1.88;  $P < 0.0001$ ,  $I^2 = 0\%$ ).

### **Stone Excretion Time**

Seven studies reported SET. In Erturhan 2007, only the mean value and stone removal time range were given. Using the estimation formula[25], the average  $\pm$  standard deviation (SD) SETs were  $7.5 \pm 2.75$  and  $6.4 \pm 2.08$  days for the experimental (combination therapy) and control (alpha-blocker monotherapy) groups, respectively. The pooled meta-analysis (Figure 4) showed no reduction in SET after combination therapy with alpha-blockers and muscarinic antagonists, compared with that after alpha-blocker monotherapy (MD =  $-1.01$ , 95% CI  $-2.62$  to  $0.59$ ;  $P = 0.22$ ,  $I^2 = 95\%$ ).

### **Renal Colic**

Among the four studies that reported renal colic occurrence, one study reported on the incidence and significantly reduced pain frequency with alpha-adrenergic antagonist monotherapy than with combination therapy (13.2% vs. 27.9%)[24]; the other three studies reported the average frequency of renal colic[13,14,20]. The pooled results (Figure 5) showed that compared with alpha-blocker monotherapy, combination therapy significantly reduced the number of PEs (MD =  $-0.75$ , 95% CI  $-1.10$  to  $-0.4$ ,  $P < 0.0001$ ).

### **Visual Analogue Scale**

In four studies[13,14,19,23], VAS was used to record the pain descriptions of all patients. A score of 0 indicated no pain, and a score of 10 indicated the most severe and unbearable pain. The SD data of the VAS were not reported in Erturhan 2007[23]; therefore, this meta-analysis included only the VAS of the remaining three studies. The pooled results showed that compared with patients treated with alpha-blocker alone, those treated with combination therapy had less pain at 3 days (MD = -3.14, 95% CI -3.44 to -2.84,  $P < 0.00001$ ); 7 days (MD = -3.77, 95% CI -4.02 to -3.52,  $P < 0.00001$ ) and 4 weeks (MD = -1.00, 95% CI -1.40 to -0.60,  $P < 0.00001$ ) (Figure 6).

### **Urinary Sensation Scale**

Two studies reported the USS[13,14], which patients used to assess the degree of urination urgency on a five-point scale (1 = no urination, 2 = mild urination, 3 = moderate urination, 4 = severe urination and 5 = urinary incontinence)[26]. The pooled results showed that the USS score was significantly lower with combination therapy than with alpha-blocker monotherapy at 3 days (MD = -0.93, 95% CI -1.10 to -0.77,  $P < 0.00001$ ) and 7 days (MD = -0.53, 95% CI -0.68 to -0.38,  $P < 0.00001$ ). Moreover, the bladder irritation symptoms of patients with urinary urgency significantly improved after the addition of muscarinic antagonists (Figure 7).

### **Adverse Effects**

Three studies reported the occurrence of adverse effects, including headache, dizziness, fatigue, orthostatic hypotension, retrograde ejaculation, constipation, dry mouth and rhinitis. There was no significant heterogeneity ( $I^2 = 0\%$ ); therefore, a fixed effects model was used to compare the adverse effects between combination therapy and alpha-blocker alone. The meta-analysis (Figure 8) showed that combination therapy and alpha-blocker alone had no significant differences in the adverse effects of headache and dizziness (RR = 1.35, 95% CI 0.76 to 2.42,  $P = 0.31$ ); fatigue (RR = 1.66, 95% CI 0.56 to 4.89,  $P = 0.36$ ); orthostatic hypotension (RR = 0.97, 95% CI 0.14 to 6.66,  $P = 0.97$ ); retrograde ejaculation (RR = 0.71, 95% CI 0.23 to 2.17,  $P = 0.55$ ) and rhinitis (RR = 0.66, 95% CI 0.09 to 4.88,  $P = 0.68$ ) but significantly differed in terms of the adverse effects of constipation and dry mouth (RR = 3.86, 95% CI 1.77 to 8.44,  $P = 0.0007$ ).

### **Sensitivity Analysis**

Among the eight studies included in this meta-analysis, heterogeneity existed among certain outcome indicators. Therefore, a sensitivity analysis was conducted to determine the sources of heterogeneity for each outcome. Sequential exclusion of each study had a significant impact on the SER but not on the SET, indicating instability of results.

### **Publication Bias**

The funnel plots showed outliers among the eight studies, indicating potential publication bias for SER or SET (Supplementary Figure 1 and Figure 2).

### **Discussion**

Currently, the European Association of Urology (EAU)/American Urological Association (AUA) guidelines recommend the use of alpha blockers for distal ureteral stones[27, 28]. Several systematic reviews and meta-analyses have evaluated the efficacy of alpha blockers for ureteral stones in the past few years[29-32]. However, no systematic review or meta-analysis has evaluated the efficacy and safety of muscarinic antagonists combined with alpha-blockers in medical expulsion therapy for distal ureteral stones. This meta-analysis and the pooled results demonstrated significantly higher SER with combination therapy than with alpha-blocker or muscarinic antagonist monotherapy (combination therapy: 79.5% vs. alpha-blocker monotherapy: 68%,  $P = 0.04$ ; combination therapy: 76.7% vs. muscarinic antagonist monotherapy: 50%,  $P < 0.00001$ ). Moreover, combination therapy reduced the number of PEs and urinary symptoms. However, there were no significant differences in SET and adverse effects, except for constipation and dry mouth.

Factors affecting ureteral calculi expulsion include stone location, size, number and structure; ureteral smooth muscle spasm; mucosal oedema or inflammation and ureteral anatomy[33]. The most important obstruction site for passing calculi is the distal end of the ureter, especially the intramural ureter, which is the narrowest part[10]. Considering that the distal ureter is adjacent to the bladder, stones are easily embedded in the stenosed inner wall segment, predisposing patients to renal ureteral colic or accompanying urinary urgency and frequency, similar to overactive bladder (OAB)[33]. Based on these, we investigated whether the combined use of standard drugs for OAB (muscarinic antagonists) and lower ureteral calculi (alpha-blockers) can exert synergistic effects to improve stone removal efficiency, alleviate LUTS caused by lower ureteral calculi and relieve pain. Alpha-adrenergic antagonists block adrenergic receptors in the bladder to enhance the effects of muscarinic antagonists, which reduce muscarine release

from the prostate or urethra and enhance the effects of alpha-blockers[34, 35]. Dual treatment enhances bladder storage and relieves LUTS and pain.

Alpha-blockers are generally used for MET of distal ureteral calculi[36]. In humans, alpha 1A- and 1D-adrenergic receptors are mainly expressed in the smooth muscle cells of the ureter. Alpha-adrenergic blockers act on the distal ureter and relieve lower urinary tract obstruction and irritation by reducing ureteral smooth muscle tension, thereby, causing relaxation and relieving smooth muscle spasm[37]. In addition to accelerating the expulsion of small distal ureteral stones and relaxing spastic smooth muscles, alpha-blockers can provide analgesic effects and reduce LUTS to some extent[38]. Treatment with alpha-adrenergic antagonists is recommended for distal ureteral calculi  $\geq 5$  mm, according to the AUA, EAU, and Urological Association of Asia guidelines, and for distal ureteral calculi  $< 10$  mm, according to the Canadian Urological Association and the National Institute for Health and Care Excellence[39, 40]. In this meta-analysis, the mean stone size of all patients was 7.1 mm, which is consistent with the recommended guidelines on the use of alpha-adrenergic antagonists for stone expulsion. However, in a study by Hermans et al., the average number of analgesics taken before distal ureteral stone passage was three in the group treated with tamsulosin ( $n = 50$ ) and seven in the placebo group ( $n = 50$ ), underscoring the fact that although tamsulosin can alleviate pain to a certain extent, the demand for analgesics remained high[41]. According to the EAU guidelines, the standard treatment for relieving renal and ureteral colic is intake of non-steroidal anti-inflammatory drugs (NSAIDs), such as diclofenac sodium[42]. Maldonado found that although NSAIDs, such as diclofenac and indomethacin suppositories, can alleviate acute pain from distal ureteral stones, the effect was slow in many patients, the root cause of pain was not resolved and gastrointestinal adverse effects were common[43].

Muscarinic antagonists selectively block M2 and M3 receptors on the detrusor muscle cells of the bladder, reduce involuntary bladder contractions or alter contraction thresholds, decrease afferent bladder nerve activity and increase bladder volume. To reduce urinary urgency and frequency, address urinary incontinence and improve the health-related quality of life [12, 44, 45], muscarinic antagonists are commonly used to treat patients with OAB. Renal ureteral colic, urinary urgency and frequency and pain on the glans penis associated with the distal ureter may be controlled by muscarinic antagonists[25, 46]. Kaplan found that compared with placebo, the combination of tolterodine and tamsulosin significantly improved urge incontinence ( $-0.88$  vs.  $-0.31$ ,  $P = 0.005$ ); episodes of urinary urgency without urinary incontinence ( $-3.33$  vs.  $-2.54$ ,  $P = 0.03$ ) and urinary frequency for 24 h ( $-2.54$  vs.  $-1.41$ ,  $P < 0.001$ ) and per night ( $-0.59$  vs.  $-0.39$ ,  $P = 0.02$ ) in men with moderate to severe LUTS[47]. Meanwhile, inhibition of glandular secretion is the main adverse effect of muscarinic antagonists. The feeling of dry mouth prompts patients to drink a lot of water, which increases urine volume and flow and may be beneficial to stone excretion. Three systematic reviews have evaluated the effectiveness of mirabegron for treating ureteral stones[48–50], and the pooled results demonstrated that mirabegron significantly increased SER in patients with distal ureteral stones. This meta-analysis showed that constipation and dry mouth were the main adverse effects of combination therapy, compared with alpha-blocker alone. Dry mouth and constipation are common antimuscarinic drug-related adverse events. In the future, reducing these toxic adverse effects will enable patients to have better tolerance of combination therapy. Existing evidence suggests that  $\beta 3$ -adrenergic receptor agonists, such as mirabegron and vibegron, have a lower incidence of dry mouth than antimuscarinics, such as tolterodine[51, 52]. Based on these reasons, the combination of new  $\beta 3$ -adrenergic receptor agonists and alpha blockers is a promising treatment option for distal ureteral stones. Combination therapy with alpha-blocker and muscarinic antagonist not only improved bladder irritation but also significantly alleviated renal and ureteral colic caused by stones. Among the clinical trials on tamsulosin alone to assist in the expulsion of 5–10-mm distal ureteral calculi, the reported frequencies of renal ureteral colic were  $1.60 \pm 1.0$ [47],  $1.70 \pm 1.2$ [44],  $1.60 \pm 1.0$ [47] and  $2.90 \pm 0.90$ [53] times. In the articles included in this meta-analysis[13, 14, 20], the PEs among patients treated with tamsulosin alone and combination therapy were  $3.2 \pm 2.1$  and  $2.8 \pm 1.8$  times,  $2.27 \pm 0.91$  and  $1.39 \pm 1.34$  times and  $2.25 \pm 0.90$  and  $1.38 \pm 1.37$  times, respectively. These data indicated that pain was less with combination therapy than with tamsulosin alone. The VAS was significantly lower in the combination therapy group than in the alpha-blocker monotherapy group. Moreover, the lower mean number of PEs and VAS with combination therapy than with monotherapy make it reasonable to speculate that the combination of alpha-blockers and muscarinic antagonists can relieve the onset pain from renal ureteral colic. In Erturhan 2007 [19], although the SD data on PE and VAS were missing, the data showed a trend of less degree of colic with combination

therapy than with alpha-blocker alone (VAS: 4.1 vs. 4.7). Chu et al. only recorded the number of patients requiring meperidine (Demerol) analgesia for severe renal colic in the combination therapy and alpha-adrenergic antagonist alone (0 vs. 5), respectively[24]. Based on these available data from the two articles, pain control and alleviation of patient discomfort were more effective with combination therapy than with alpha-blocker alone.

### Limitations

This meta-analysis had some inevitable limitations. First, due to the small number of included studies and large heterogeneity of the partial results, the  $I^2$  statistic was not effective enough. Second, majority of the randomised studies in this systematic review were small single-centre studies that reported insufficient raw data, which precluded subgroup analyses by stone size and drug type and limited the strength of our conclusions. Therefore, multicentre, randomised, placebo-controlled trials are needed for further validation. Third, like any systematic review, our analysis was limited by the data included in the studies, and we had to rely as much as possible on imperfect datasets. Nevertheless, to the best of our knowledge, these were the best available data that showed the effectiveness of combining alpha-blockers and muscarinic antagonists to improve the symptoms of patients with lower ureteral stones. To support our findings, future clinical trials may further investigate the use of serum biomarkers, such as C-reactive protein, which was reported to be associated with MET failure at relatively high levels[54].

### Conclusion

For patients with solitary lower ureteral stones measuring less than 10 mm, the combination of adrenergic alpha-blockers and muscarinic antagonists appears to be more effective than alpha-blocker monotherapy in enhancing stone expulsion, mitigating renal colic, and alleviating lower urinary tract symptoms. Although stone expulsion time is not significantly impacted, the increased risk of dry mouth and constipation must be weighed against the potential clinical benefits. Future high-quality, multicenter trials are warranted to confirm these findings and to explore better-tolerated combinations, such as beta-3 agonists paired with alpha-blockers.

### Statement of Ethics

An ethics statement is not applicable because this study is based exclusively on published literature.

### Conflict of Interest Statement

The authors have no conflict of interest to declare.

### Funding Sources

This study was supported by the Science and technology project of Gansu Province (21JR1RA119), the Cuiying Scientific and Technological Innovation Program of Lanzhou University Second Hospital (CY2021-MS-B03), and Gansu Province Healthcare Industry Research Project (No. GSWSQN2024-11). The funder had no role in the design, data collection, data analysis, and reporting of this study.

### Author contributions

HD contributed to the study conception and design. Material preparation was performed by CC, CM, SZ, and NF. Data collection and analysis were performed by ZN, ZH, CC, SZ, CM and NF. The first draft of the manuscript was written by NF, CC, SZ, CM and HD. All authors commented on previous versions of the manuscript. All authors read and approved the final manuscript.

### Data Availability Statement

All data that support the findings of this study are included in this article and its online supplementary material. Further enquiries can be directed to the corresponding author Hui Ding (dingh08@126.com).

### References

1. Alatab S, Pourmand G, El Howairis Mel F, Buchholz N, Najafi I, Pourmand MR, et al. National Profiles of Urinary Calculi: a Comparison Between Developing and Developed Worlds. *Iran J Kidney Dis.* 2016;10(2):51-61.
2. Abufaraj M, Al Karmi J, Yang L. Prevalence and trends of urolithiasis among adults. *Curr Opin Urol.* 2022;32(4):425-432.
3. Ferraro PM, Taylor EN, Gambaro G, Curhan GC. Dietary and Lifestyle Risk Factors Associated with Incident Kidney Stones in Men and Women. *J Urol.* 2017;198(4):858-863.

4. Antonelli JA, Maalouf NM, Pearle MS, Lotan Y. Use of the National Health and Nutrition Examination Survey to calculate the impact of obesity and diabetes on cost and prevalence of urolithiasis in 2030. *Eur Urol.* 2014;66(4):724-729.
5. van de Pol JAA, van den Brandt PA, Schouten LJ. Kidney stones and the risk of renal cell carcinoma and upper tract urothelial carcinoma: the Netherlands Cohort Study. *Br J Cancer.* 2019;120(3):368-374.
6. Ziembra JB, Matlaga BR. Epidemiology and economics of nephrolithiasis. *Investig Clin Urol.* 2017;58(5):299-306.
7. Yu ZW, Wang RH, Zhang CC, Gao JG. The efficacy and safety of alpha-adrenergic blockers for medical expulsion therapy in patients with ureteral calculi: A meta-analysis of placebo-controlled trials. *Medicine (Baltimore).* 2021 100(37):e27272.
8. Shokeir AA. Renal colic: new concepts related to pathophysiology, diagnosis and treatment. *Curr Opin Urol.* 2002;12(4):263-269.
9. Bensalah K, Pearle M, Lotan Y. Cost-effectiveness of medical expulsive therapy using alpha-blockers for the treatment of distal ureteral stones. *Eur Urol.* 2008;53(2):411-418.
10. Zhou SG, Lu JL, Hui JH. Comparing efficacy of  $\alpha$  1D-receptor antagonist naftopidil and  $\alpha$  1A/D-receptor antagonist tamsulosin in management of distal ureteral stones. *World J Urol.* 2011;29(6):767-771.
11. Sutherland JW, Parks JH, Coe FL. Recurrence after a single renal stone in a community practice. *Miner Electrolyte Metab.* 1985;11(4):267-9.
12. Gacci M, Novara G, De Nunzio C, Tubaro A, Schiavina R, Brunocilla E, et al. Tolterodine extended release in the treatment of male OAB/storage LUTS: a systematic review. *BMC Urol.* 2014;14:84.
13. Lv JL, Tang Q. Tamsulosin and tolterodine in the medical expulsive therapy for intramural ureteral stones with vesical irritability: a prospective randomized study. *Urolithiasis.* 2013;41(5):417-421.
14. Lu JL, Tang QL, Liu FD, Hui JH. Naftopidil and tolterodine in the medical expulsive therapy for intramural ureteral stones: a prospective randomized study. *Urol Res.* 2012;40(6):757-762.
15. Sterne JA, Jüni P, Schulz KF, Altman DG, Bartlett C, Egger M. Statistical methods for assessing the influence of study characteristics on treatment effects in 'meta-epidemiological' research. *Stat Med.* 2002;21(11):1513-1524.
16. Guyatt G, Oxman AD, Akl EA, Kunz R, Vist G, Brozek J, et al. GRADE guidelines: 1. Introduction-GRADE evidence profiles and summary of findings tables. *J Clin Epidemiol* 2011;64(4):383-394.
17. DerSimonian R. Meta-analysis in the design and monitoring of clinical trials. *Stat Med.* 1996;15(12):1237-1252.
18. Blunch NJ. [Statistical analysis of data from clinical and retrospective studies]. *Ugeskr Laeger.* 1976;138(7):401-7.
19. Erturhan S, Erbagci A, Yagci F, Celik M, Solakhan M, Sarica K. Comparative evaluation of efficacy of use of tamsulosin and/or tolterodine for medical treatment of distal ureteral stones. *Urology.* 2007;69(4):633-6.
20. Abdelaziz AS, Badran YA, Aboelsaad AY, Elhilaly H. Preliminary study of the efficacy of the combination of tamsulosin and trospium as a medical expulsive therapy for distal ureteric stones. *African Journal of Urology.* 2017;23(1):38-42.
21. Wang Y, Hou J, Wen D, Ouyang J. Comparative evaluation of efficacy of tamsulosin versus tolterodine for the management of lower ureteral stones. *Chinese Journal of Postgraduates of Medicine.* 2010;33(12):21-23.
22. Zhao XD, Wang KE, Gao WJ, Ye CH. The effectiveness of Tamsulosin and that of Tamsulosin combined with tolterodine or furosemide in treating distal ureteral stones: a comparative study. *Health Research.* 2014;34(4):402-4.
23. Zhu JP, Ma LY, Chang HF, Yan CS, Zhang QX, Xu ZL. Clinical value of tolterodine combined with tamsulosin on the treatment of ureteral calculi. *Clin J Med Offic.* 2016;44(2):124-7.
24. Chu QM, Yang XF, FU XY, Wang JM, Ba Y. Effect of m-receptor blocker combined with  $\alpha$  -receptor blocker on middle and lower ureteral calculi. *Shandong Med J.* 2011;51(13):89-90.
25. Wan X, Wang W, Liu J, Tong T. Estimating the sample mean and standard deviation from the sample size, median, range and/or interquartile range. *BMC Med Res Methodol.* 2014;14:135.
26. Brewster JL, Guan Z, Green HL, Jumadilova Z, Coyne KS. Puk19 Establishing the Content Validity of the Urinary Sensation Scale (Uss). *Value in Health.* 2005;8:418-9.

27. Türk C, Petřík A, Sarica K, Seitz C, Skolarikos A, Straub M, et al. EAU Guidelines on Diagnosis and Conservative Management of Urolithiasis. *Eur Urol.* 2016;69(3):468-74.
28. Quhal F, Seitz C. Guideline of the guidelines: urolithiasis. *Curr Opin Urol.* 2021;31(2):125-129.
29. Taheri M, Borumandnia N, Abdi H, Kashi AH, Nourani S, Sheikholeslami S, et al. Which combination of medical expulsive therapy is more effective for treatment of distal ureteral stone in adults? A systematic review and network meta-analysis. *BMC Urol.* 2025;25:18.
30. Cui Y, Chen J, Zeng F, Liu P, Hu J, Li H, et al. Tamsulosin as a Medical Expulsive Therapy for Ureteral Stones: A Systematic Review and Meta-Analysis of Randomized Controlled Trials. *J Urol.* 2019;201:950-955.
31. Liu H, Wang S, Zhu W, Lu J, Wang X, Yang W. Comparative efficacy of 22 drug interventions as medical expulsive therapy for ureteral stones: a systematic review and network meta-analysis. *Urolithiasis.* 2020;48:447-457.
32. Campschroer T, Zhu X, Vernooij RW, Lock MT. Alpha-blockers as medical expulsive therapy for ureteral stones. *Cochrane Database Syst Rev.* 2018;4:CD008509.
33. Roberts R, Bavendam T, Glasser DB, Carlsson M, Eyland N, Elinoff V. Tolterodine extended release improves patient-reported outcomes in overactive bladder: results from the IMPACT trial. *Int J Clin Pract.* 2006;60(6):752-58.
34. Széll EA, Yamamoto T, de Groat WC, Somogyi GT. Smooth muscle and parasympathetic nerve terminals in the rat urinary bladder have different subtypes of alpha(1) adrenoceptors. *Br J Pharmacol.* 2000;130(7):1685-91.
35. Casado MA, Sevilla MA, Alonso MJ, Marin J, Salaices M. Muscarinic receptors involved in modulation of norepinephrine release and vasodilatation in guinea pig carotid arteries. *J Pharmacol Exp Ther.* 1994;271(3):1638-46.
36. Liu Y, Chen Y, Liao B, Luo DY, Wang KJ, Li H, et al. Epidemiology of urolithiasis in Asia. *Asian J Urol.* 2018;5(4):205-14.
37. Cervenàkov I, Fillo J, Mardiak J, Kopecný M, Smirala J, Lepies P. Speedy elimination of ureterolithiasis in lower part of ureters with the alpha 1-blocker--Tamsulosin. *Int Urol Nephrol.* 2002;34(1):25-29.
38. Wang CJ, Huang SW, Chang CH. Efficacy of an alpha1 blocker in expulsive therapy of lower ureteral stones. *J Endourol.* 2008;22(1):41-46.
39. Jiang P, Xie L, Arada R, Patel RM, Landman J, Clayman RV. Qualitative Review of Clinical Guidelines for Medical and Surgical Management of Urolithiasis: Consensus and Controversy 2020. *J Urol.* 2020;205(4):999-1008.
40. Tzelves L, Mourmouris P, Skolarikos A. Comparison of current guidelines on medical management of stone disease. *Arch Esp Urol.* 2021;74(1):171-182.
39. Hermanns T, Sauermann P, Rufibach K, Frauenfelder T, Sulser T, Strebel RT. Is there a role for tamsulosin in the treatment of distal ureteral stones of 7 mm or less? Results of a randomised, double-blind, placebo-controlled trial. *Eur Urol.* 2009;56(3):407-412.
40. Knödler JJ, Lieske JC. Non-steroidal anti-inflammatory drugs for renal colic. *Lancet.* 2016;387(10032):1971-72.
41. Maldonado-Avila M, Del Rosario-Santiago M, Rosas-Nava JE, Manzanilla-Garcia HA, Rios-Davila VM, Rodriguez-Nava P, et al. Treatment of reno-ureteral colic by twelfth intercostal nerve block with lidocaine versus intramuscular diclofenac. *Int Urol Nephrol.* 2017;49(3):413-417.
42. Narain S, Parmar M. Tolterodine. Treasure Island (FL) ineligible companies. Disclosure: Mayur Parmar declares no relevant financial relationships with ineligible companies.: StatPearls Publishing Copyright © 2024, StatPearls Publishing LLC.; 2024.
43. Staskin D, Herschorn S, Fialkov J, Tu LM, Walsh T, Schermer CR. A prospective, double-blind, randomized, two-period crossover, multicenter study to evaluate tolerability and patient preference between mirabegron and tolterodine in patients with overactive bladder (PREFER study). *Int Urogynecol J.* 2018;29(2):273-83.
44. Kumar S, Jayant K, Agrawal MM, Singh SK, Agrawal S, Parmar KM. Role of tamsulosin, tadalafil, and silodosin as the medical expulsive therapy in lower ureteric stone: a randomized trial (a pilot study). *Urology.* 2015;85(1):59-63.
45. Kaplan SA, Roehrborn CG, Rovner ES, Carlsson M, Bavendam T, Guan Z. Tolterodine and tamsulosin for treatment of men with lower urinary tract symptoms and overactive bladder: a randomized controlled trial. *Jama.* 2006;296(19):2319-28.

46. Roehrborn CG, Kaplan SA, Jones JS, Wang JT, Bavendam T, Guan Z. Tolterodine extended release with or without tamsulosin in men with lower urinary tract symptoms including overactive bladder symptoms: effects of prostate size. *Eur Urol.* 2009;55(2):472-479.
47. Jayant K, Agrawal R, Agrawal S. Tamsulosin versus tamsulosin plus tadalafil as medical expulsive therapy for lower ureteric stones: a randomized controlled trial. *Int J Urol.* 2014;21(10):1012-15.
48. Song H, Liang L, Liu H, Liu Y, Hu W, Zhang G, et al. Mirabegron for medical expulsive therapy of ureteral stones: a systematic review and meta-analysis. *Front Med (Lausanne).* 2024;10:1280487.
49. Cai D, Wei G, Wu P, Huang Y, Che X, Zhang Y, et al. The Efficacy of Mirabegron in Medical Expulsive Therapy for Ureteral Stones: A Systematic Review and Meta-Analysis. *Int J Clin Pract.* 2022;2022:2293182.
50. Wang Z, Chi J, Liu Y, Wu J, Cui Y, Yang C. Efficacy of mirabegron for ureteral stones: a systematic review with meta-analysis of randomized controlled trials. *Front Pharmacol.* 2023;14:1326600.
51. Wagg A, Nitti VW, Kelleher C, Castro-Diaz D, Siddiqui E, Berner T. Oral pharmacotherapy for overactive bladder in older patients: mirabegron as a potential alternative to antimuscarinics. *Curr Med Res Opin.* 2016;32(4):621-38.
52. Su SY, Liang LQ, Lin JL, Liu LD, Chen ZP, Gao Y. Systematic review and meta-analysis of the efficacy and safety of vibegron vs antimuscarinic monotherapy for overactive bladder. *Medicine (Baltimore).* 2021;100(5):e23171.
53. Kumar S, Jayant K, Agrawal S, Singh SK. Comparative efficacy of tamsulosin versus tamsulosin with tadalafil in combination with prednisolone for the medical expulsive therapy of lower ureteric stones: a randomized trial. *Korean J Urol.* 2014;55(3):196-200.
54. Ramasamy V, Aarthy P, Sharma V, Thakur APS. Role of inflammatory markers and their trends in predicting the outcome of medical expulsive therapy for distal ureteric calculus. *Urol Ann.* 2022;14(1):8-14.

#### Figure legends

Figure 1. PRISMA flow diagram

Figure 2. Quality assessment using the risk of bias (ROB) tool

Figure 3. Comparison of stone excretion rate (SER) for distal ureteral stones  
Comparisons of SER between (A) combination therapy and alpha-adrenergic blockers, (B) combination therapy and muscarinic antagonists, and (C) alpha-adrenergic blocker monotherapy and muscarinic antagonist monotherapy

Figure 4. Lower ureteric stone excretion time  
Comparison between combination therapy and alpha-blocker monotherapy

Figure 5. Frequency of renal colic  
Comparison between combination therapy and alpha-blockers monotherapy for lower ureteric stone treatment

Figure 6. VAS after lower ureteric stone treatment  
Comparisons between combination therapy and alpha-blocker monotherapy after 3 days, 7 days and 4 weeks

Figure 7. USS after lower ureteric stone treatment  
Comparisons between combination therapy and alpha-blocker monotherapy after 3 days and 7 days

Figure 8. Adverse effects of lower ureteric stone treatment

Accepted Manuscript

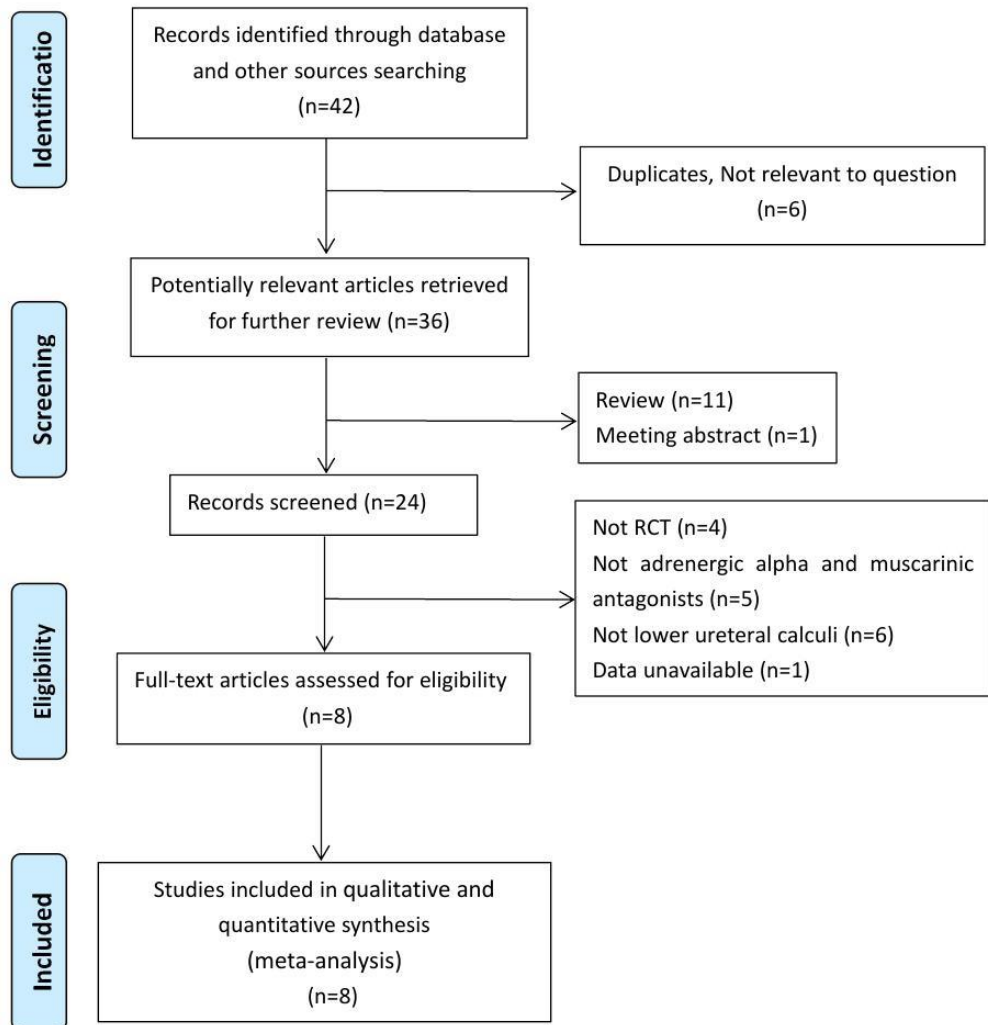

|                     | Random sequence generation (selection bias) | Allocation concealment (selection bias) | Blinding of participants and personnel (performance bias) | Blinding of outcome assessment (detection bias) | Incomplete outcome data (attrition bias) | Selective reporting (reporting bias) | Other bias |
|---------------------|---------------------------------------------|-----------------------------------------|-----------------------------------------------------------|-------------------------------------------------|------------------------------------------|--------------------------------------|------------|
| Abdelaziz 2017 [20] | +                                           | ?                                       | +                                                         | +                                               | +                                        | +                                    | +          |
| Chu 2011 [24]       | ●                                           | ●                                       | ?                                                         | ?                                               | +                                        | +                                    | +          |
| Erturhan 2007 [19]  | +                                           | ?                                       | ?                                                         | ?                                               | +                                        | +                                    | +          |
| Lu 2012 [14]        | +                                           | ?                                       | ?                                                         | ?                                               | +                                        | +                                    | +          |
| Lv 2013 [13]        | +                                           | +                                       | ?                                                         | +                                               | +                                        | +                                    | +          |
| Wang 2010 [21]      | +                                           | ?                                       | ?                                                         | ?                                               | +                                        | +                                    | +          |
| Zhao 2014 [22]      | ?                                           | ?                                       | ?                                                         | ?                                               | +                                        | +                                    | +          |
| Zhu 2016 [23]       | +                                           | ?                                       | ?                                                         | ?                                               | +                                        | +                                    | +          |

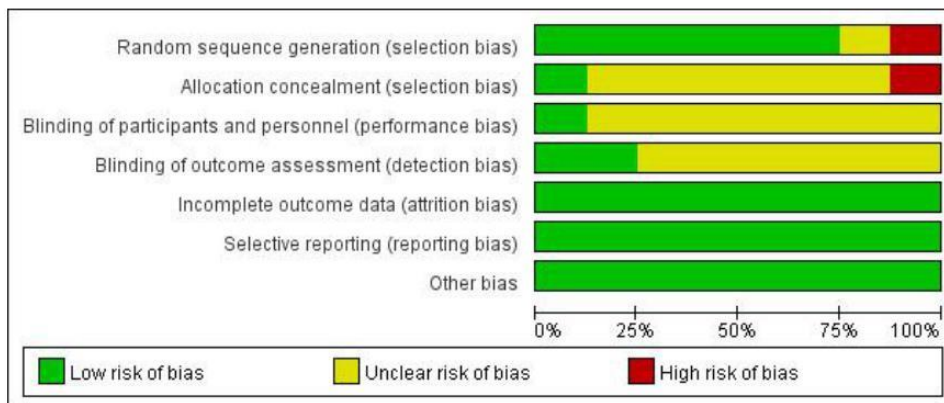

A

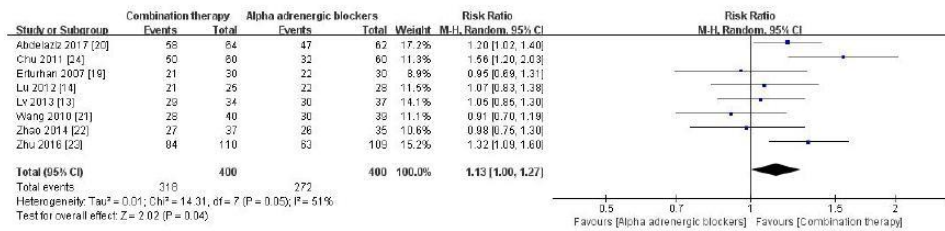

B

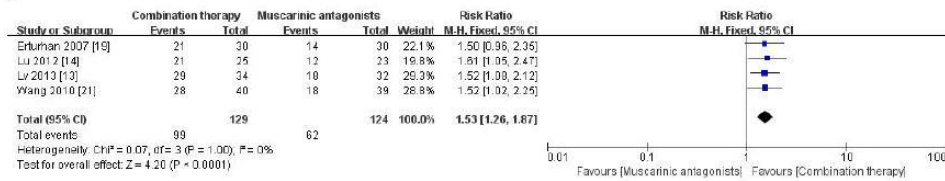

C

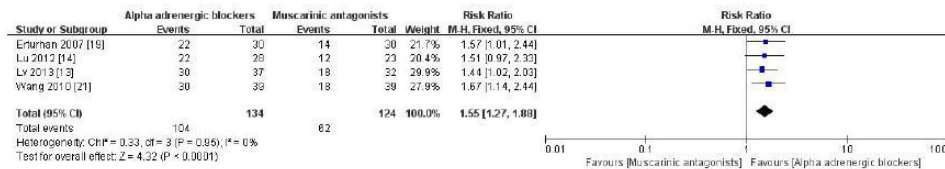

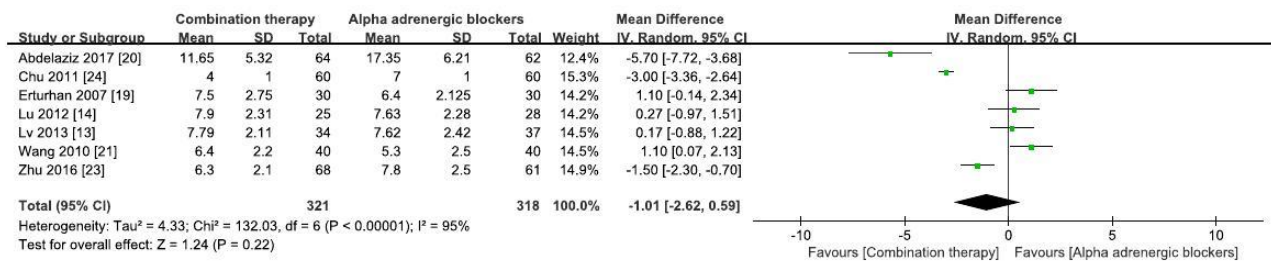

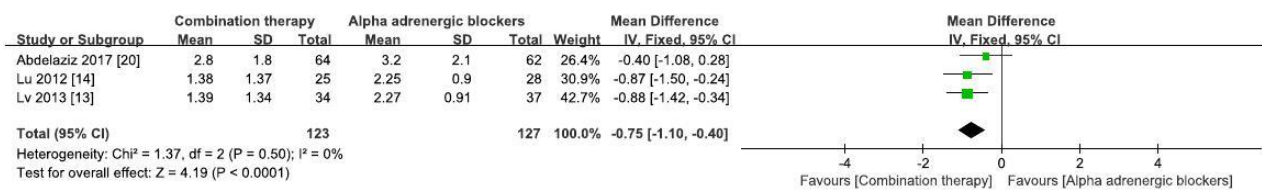

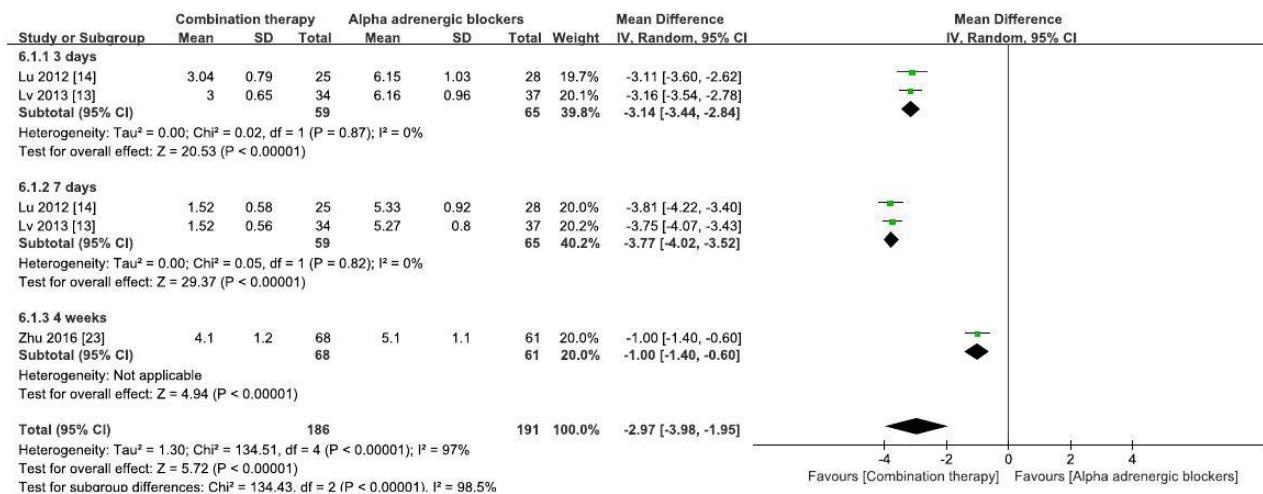

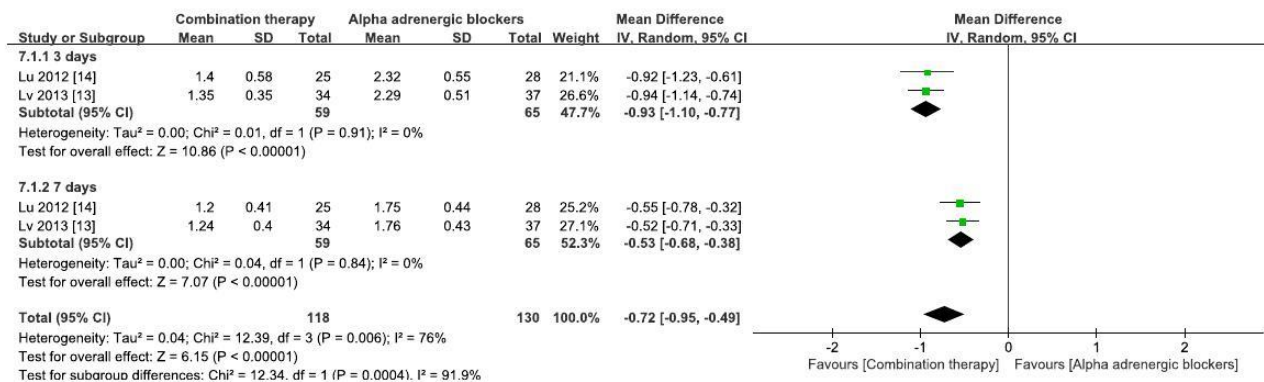

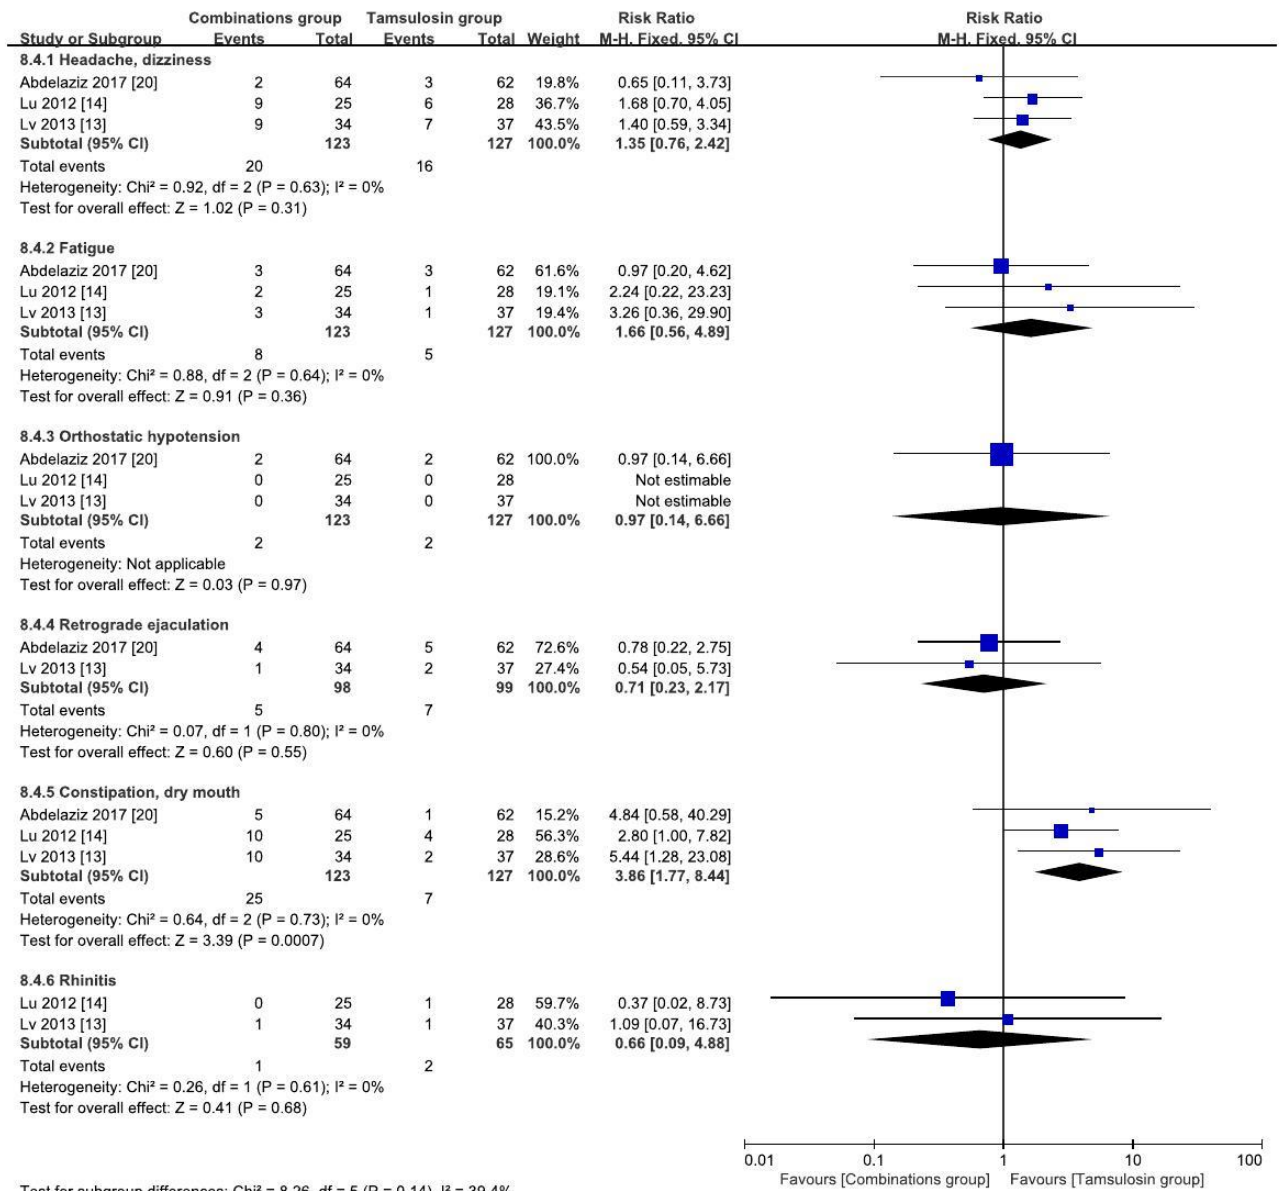

**Table 1 Characteristics of the included studies of lower ureteric stones in meta-analysis**

| Study<br>Authors,<br>year | Stone size                | Patients | Intervention                | Follow-up | Mean/median age (years) | Number<br>of<br>male/female | Ureteral stone side<br>(Left/Right) |
|---------------------------|---------------------------|----------|-----------------------------|-----------|-------------------------|-----------------------------|-------------------------------------|
| Erturhan<br>2007 [19]     | stones less than<br>10 mm | 120      | Tamsulosin (30)             | ≤3 weeks  | 32.7                    | 64/56                       | 53/67                               |
|                           |                           |          | Tamsulosin+tolterodine (30) |           | 35.8                    |                             |                                     |
|                           |                           |          | Tolterodine (30)            |           | 34.7                    |                             |                                     |
|                           |                           |          | Nothing (30)                |           | 31.4                    |                             |                                     |
| Wang 2010<br>[21]         | 4 mm-10 mm                | 160      | Tamsulosin (40)             | 2 weeks   | 35.4                    | 84/76                       | NA                                  |
|                           |                           |          | Tamsulosin+tolterodine (40) |           | 34.3                    |                             |                                     |
|                           |                           |          | Tolterodine (40)            |           | 33.8                    |                             |                                     |
|                           |                           |          | Nothing (40)                |           | 35.5                    |                             |                                     |
| Chu 2011<br>[24]          | 4 mm-8 mm                 | 120      | Tamsulosin (60)             | ≤3 weeks  | 32                      | 81/39                       | NA                                  |
|                           |                           |          | Tamsulosin+tolterodine (60) |           | 37                      |                             |                                     |
| Lu 2012<br>[14]           | stones less than<br>9 mm  | 76       | Naftopidil (28)             | 2 weeks   | 32.19                   | 39/37                       | 39/37                               |
|                           |                           |          | Naftopidil+tolterodine (25) |           | 33.67                   |                             |                                     |
|                           |                           |          | Tolterodine (23)            |           | 34.32                   |                             |                                     |
| Lv 2013<br>[13]           | stones less than<br>9 mm  | 103      | Tamsulosin (37)             | 2 weeks   | 32.14                   | 64/39                       | 59/44                               |
|                           |                           |          | Tamsulosin+tolterodine (34) |           | 33.36                   |                             |                                     |
|                           |                           |          | Tolterodine (32)            |           | 34.35                   |                             |                                     |
| Zhao 2014<br>[22]         | 4 mm-10 mm                | 120      | Tamsulosin (40)             | ≤15 days  | 36                      | 80/40                       | NA                                  |
|                           |                           |          | Tamsulosin+tolterodine (40) |           | 35                      |                             |                                     |
|                           |                           |          | Tamsulosin+frusemide (40)   |           | 37                      |                             |                                     |
| Zhu 2016<br>[23]          | stones less than<br>10 mm | 129      | Tamsulosin+tolterodine (68) | ≤4 weeks  | 35.7                    | NA                          | NA                                  |
|                           |                           |          | Tamsulosin (61)             |           | 37.5                    |                             |                                     |
| Abdelaziz<br>2017 [20]    | stones less than<br>10 mm | 126      | Tamsulosin+placebo (62)     | ≤4 weeks  | 39.02                   | 61/25                       | 47/39                               |
|                           |                           |          | Tamsulosin+trospium (64)    |           | 36.43                   |                             |                                     |

NA, not available.

**Table 2 Summary of the results in the included studies.**

| Study               | Comparators                      | Stone expulsion rate (%) | Mean days to stone expulsion $\pm$ SD (days) | Pain episodes (times) $\pm$ SD | Urinary Sensation Scale $\pm$ SD | Visual analog scale $\pm$ SD |
|---------------------|----------------------------------|--------------------------|----------------------------------------------|--------------------------------|----------------------------------|------------------------------|
| Erturhan 2007 [19]  | Tamsulosin (30)                  | 22, 73.3%                | 6.4 $\pm$ 2.083                              | 1.7                            | NA                               | 4.7                          |
|                     | Tamsulosin+tolterodine (30)      | 21, 70%                  | 7.5 $\pm$ 2.6957                             | 2.1                            |                                  | 4.1                          |
|                     | Tolterodine (30)                 | 14, 46.6%                | 11.4 $\pm$ 2.6957                            | 4.5                            |                                  | 8.5                          |
|                     | Nothing (30)                     | 12, 40%                  | 12.2 $\pm$ 3.676                             | 4.7                            |                                  | 8.8                          |
| Wang 2010 [21]      | Tamsulosin (39)                  | 30, 76.9%                | 5.3 $\pm$ 2.5                                | NA                             | NA                               | NA                           |
|                     | Tamsulosin+tolterodine (40)      | 28, 70%                  | 6.4 $\pm$ 2.2                                |                                |                                  |                              |
|                     | Tolterodine (39)                 | 18, 46.2%                | 10.7 $\pm$ 1.8                               |                                |                                  |                              |
|                     | Nothing (38)                     | 16, 42.1%                | 12.8 $\pm$ 3.4                               |                                |                                  |                              |
| Chu 2011 [24]       | Tamsulosin (60)                  | 32, 53.3%                | 7 $\pm$ 1                                    | NA                             | NA                               | NA                           |
|                     | Tamsulosin+tolterodine (60)      | 50, 83.3%                | 4 $\pm$ 1                                    |                                |                                  |                              |
| Lu 2012 [14]        | Naftopidil (28)                  | 22, 78.6%                | 7.63 $\pm$ 2.28                              | 2.25 $\pm$ 0.90,               | 3days                            | 3days                        |
|                     | Naftopidil+tolterodine (25)      | 21, 84.0%                | 7.90 $\pm$ 2.31                              | 1.38 $\pm$ 1.37                | 2.32 $\pm$ 0.55                  | 6.15 $\pm$ 1.03              |
|                     | Tolterodine (23)                 | 12, 52.2%                | 10.71 $\pm$ 2.72                             | 1.54 $\pm$ 1.18                | 1.4 $\pm$ 0.58                   | 3.04 $\pm$ 0.79              |
|                     |                                  |                          |                                              |                                | 1.34 $\pm$ 0.49                  | 3.13 $\pm$ 1.32              |
|                     |                                  |                          |                                              |                                | 7days                            | 7days                        |
|                     |                                  |                          |                                              |                                | 1.75 $\pm$ 0.44                  | 5.33 $\pm$ 0.92              |
|                     |                                  |                          |                                              |                                | 1.2 $\pm$ 0.41                   | 1.52 $\pm$ 0.58              |
|                     |                                  |                          |                                              |                                | 1.22 $\pm$ 0.42                  | 1.56 $\pm$ 0.51              |
| Lv 2013 [13]        | Tamsulosin (37)                  | 30, 81.1 %               | 7.62 $\pm$ 2.42,                             | 2.27 $\pm$ 0.91                | 3days                            | 3days                        |
|                     | Tamsulosin+tolterodine (34)      | 29, 85.29%               | 7.79 $\pm$ 2.11,                             | 1.39 $\pm$ 1.34                | 2.29 $\pm$ 0.51                  | 6.16 $\pm$ 0.96              |
|                     | Tolterodine (32)                 | 18, 56.25%               | 10.57 $\pm$ 2.71                             | 1.38 $\pm$ 1.20                | 1.35 $\pm$ 0.54                  | 3.00 $\pm$ 0.65              |
|                     |                                  |                          |                                              |                                | 1.31 $\pm$ 0.47                  | 3.31 $\pm$ 1.49              |
|                     |                                  |                          |                                              |                                | 7days                            | 7days                        |
|                     |                                  |                          |                                              |                                | 1.76 $\pm$ 0.43                  | 5.27 $\pm$ 0.80              |
|                     |                                  |                          |                                              |                                | 1.24 $\pm$ 0.40                  | 1.52 $\pm$ 0.56              |
|                     |                                  |                          |                                              |                                | 1.19 $\pm$ 0.40                  | 1.53 $\pm$ 0.51              |
| Zhao 2014 [22]      | Tamsulosin (35)                  | 26, 74.3%                | NA                                           | NA                             | NA                               | NA                           |
|                     | Tamsulosin+tolterodine (37)      | 27, 73%                  |                                              |                                |                                  |                              |
|                     | Tamsulosin+frusemide (38)        | 33, 86.8%                |                                              |                                |                                  |                              |
| Zhu 2016 [23]       | Tamsulosin+tolterodine (68)      | 58, 85.3%                | 6.3 $\pm$ 2.1                                | NA                             | NA                               | 4.1 $\pm$ 1.2                |
|                     | Tamsulosin (61)                  | 43, 70.5%                | 7.8 $\pm$ 2.5                                |                                |                                  | 5.1 $\pm$ 1.1                |
| Abdelaziz 2017 [20] | Tamsulosin (62)                  | 47, 75.8%                | 17.35 $\pm$ 6.21                             | 3.2 $\pm$ 2.1                  | NA                               | NA                           |
|                     | Tamsulosin+tropium chloride (64) | 58, 90.62%               | 11.65 $\pm$ 5.32                             | 2.8 $\pm$ 1.8                  |                                  |                              |

NA, not available.
